# Supplementary material for: Identification of Plasmodium falciparum specific translation inhibitors from the MMV Malaria Box using a high throughput in vitro translation screen
Source: PubMed Central journal article supplement (PMC4794828; doi:10.1186/s12936-016-1231-8), 2016-03-17

Figure S1

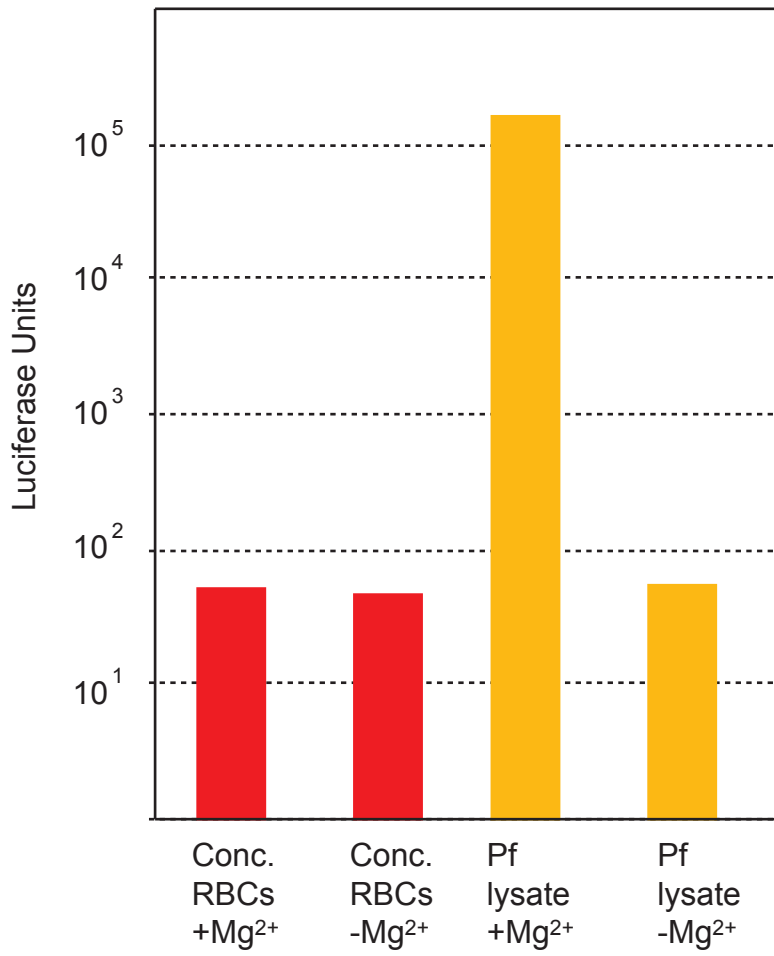

Supplement: 12936_2016_1231_MOESM1_ESM.pdf [file 12936_2016_1231_MOESM1_ESM.pdf]
